# Supplementary material for: The Adverse Effects of Triptolide on the Reproductive System of Caenorhabditis elegans: Oogenesis Impairment and Decreased Oocyte Quality
Source: PubMed Central journal article supplement (PMC5343997; doi:10.3390/ijms18020464), 2017-02-21
Supplement: ijms-18-00464-s001.pdf [file ijms-18-00464-s001.pdf]

## Supplementary Materials: The Adverse Effects of Triptolide on the Reproductive System of *Caenorhabditis elegans*: Oogenesis Impairment and Decreased Oocyte Quality

Qinli Ruan, Yun Xu, Rui Xu, Jiaying Wang, Yongqing Hua, Meng Wang and Jinao Duan

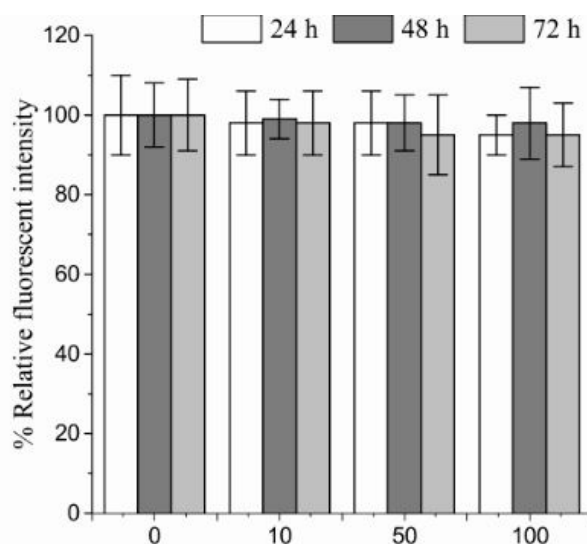

**Figure S1.** Comparison of the effects of Triptolide on the relative fluorescent intensity of the DTCs after 24, 48, and 72 h of the exposure.
